# Supplementary material
Source: PubMed Central journal article supplement (PMC3204390)

# Supplementary Figure 1

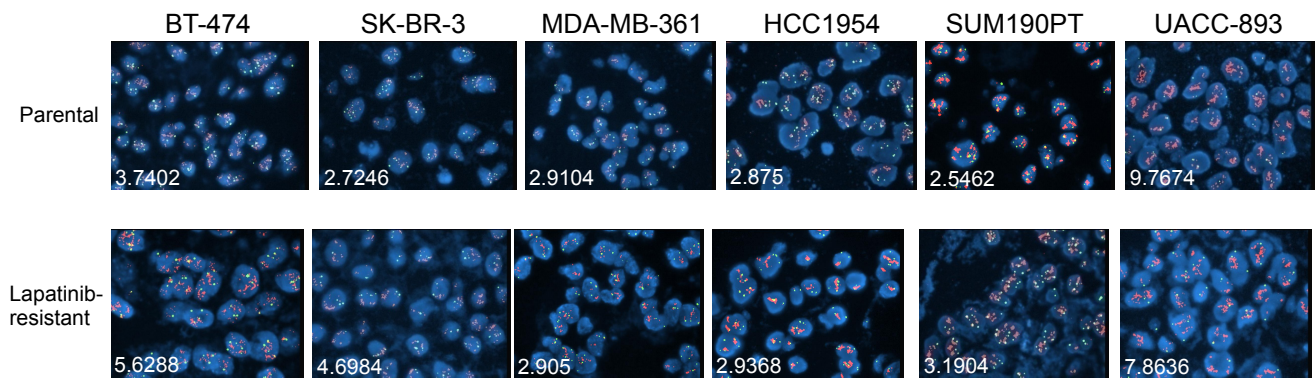

Supplement: NIHMS282065-supplement-3.pdf [file NIHMS282065-supplement-3.pdf]

# Supplementary Figure 2

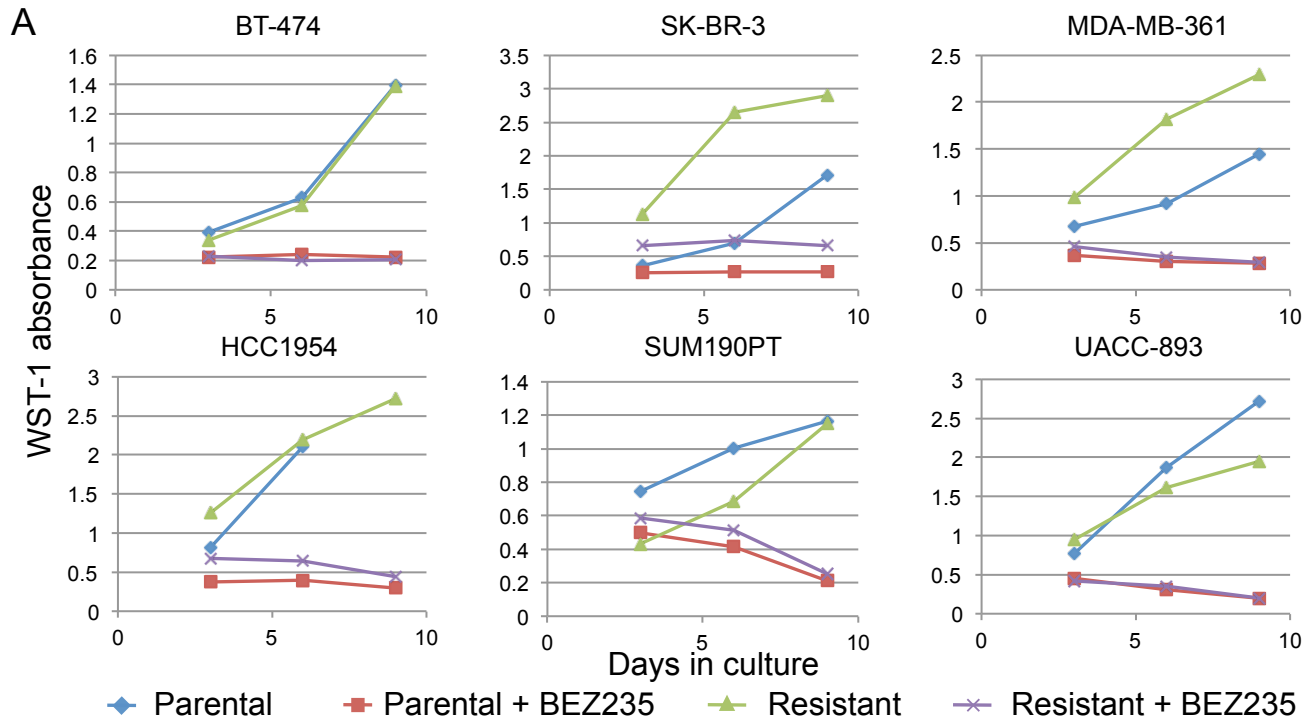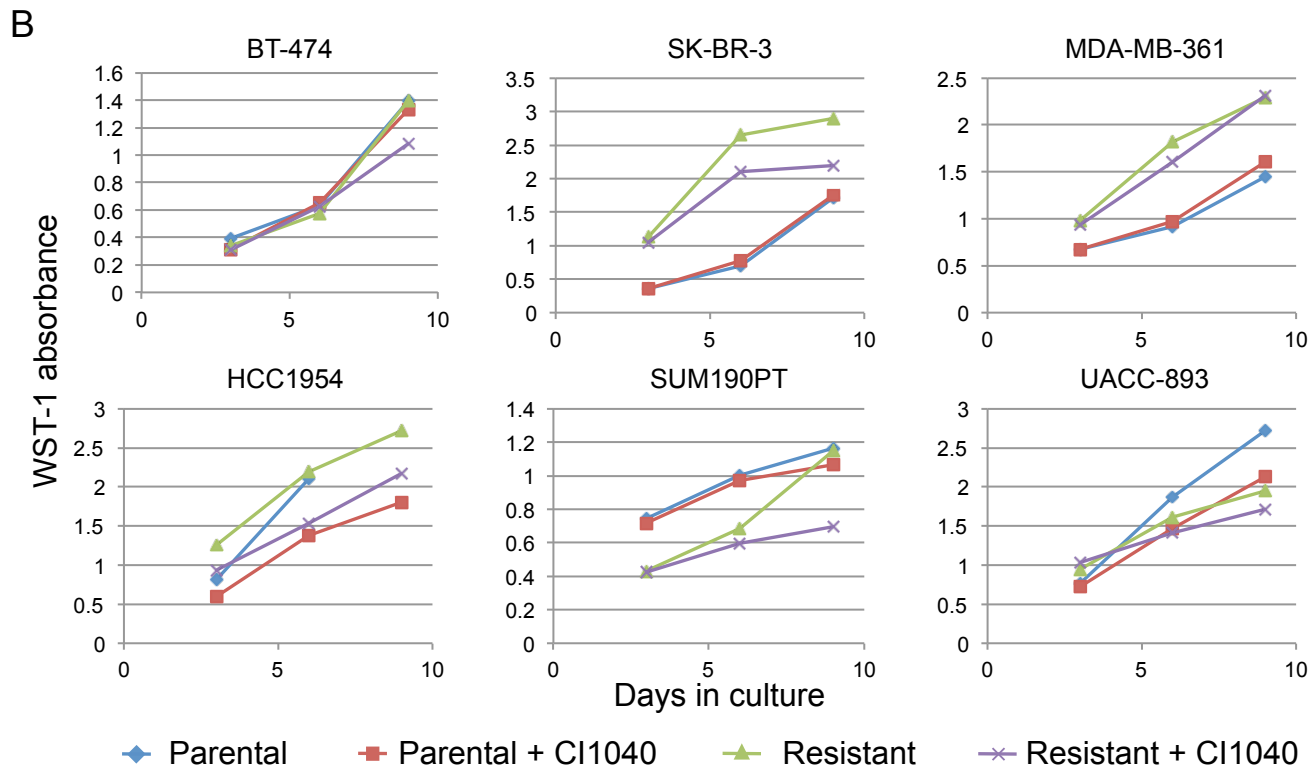

Supplement: NIHMS282065-supplement-4.pdf [file NIHMS282065-supplement-4.pdf]

# Supplementary Figure 3

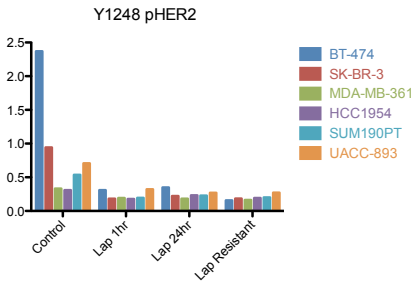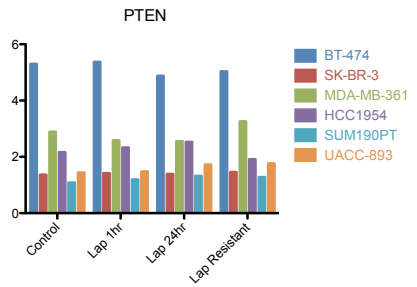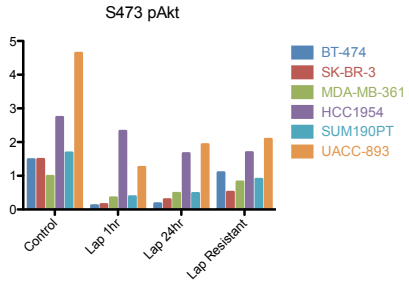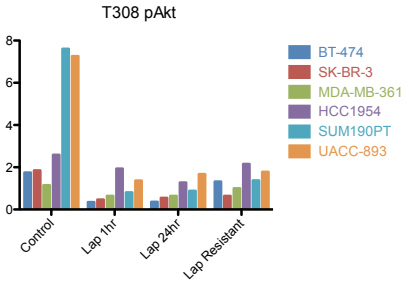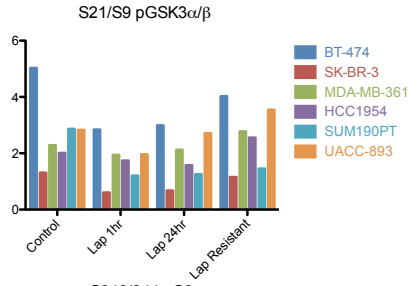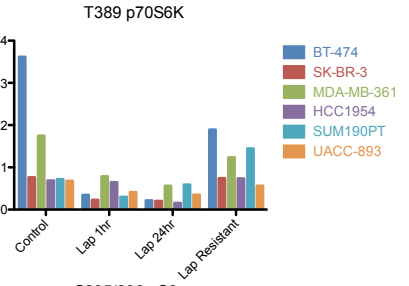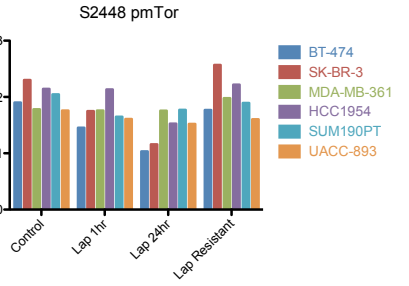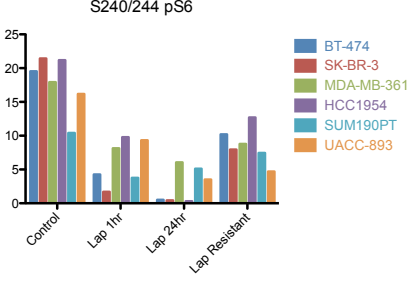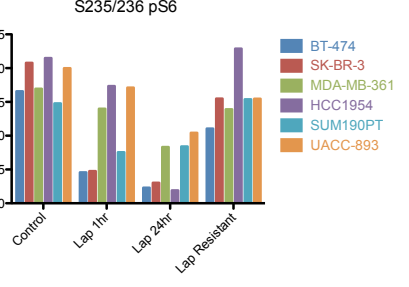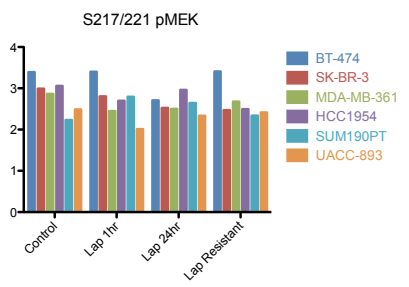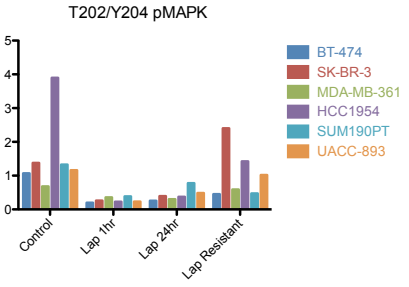

Supplement: NIHMS282065-supplement-5.pdf [file NIHMS282065-supplement-5.pdf]

# Supplementary Figure 4

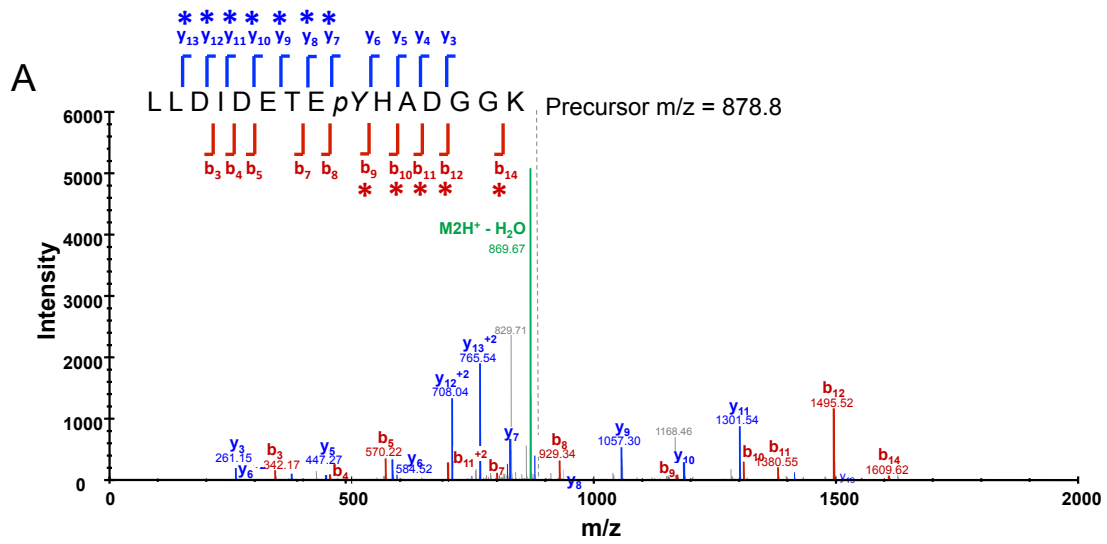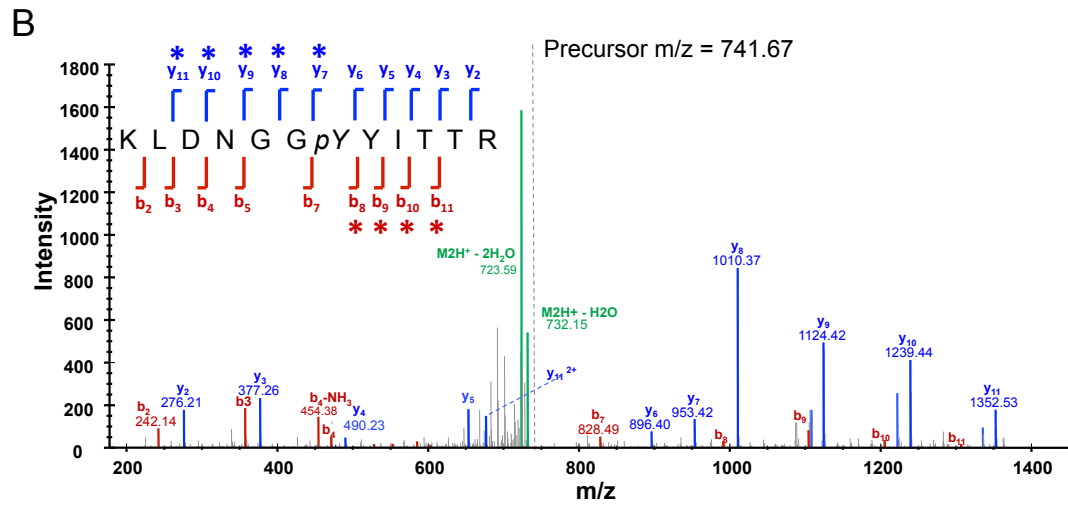

Supplement: NIHMS282065-supplement-6.pdf [file NIHMS282065-supplement-6.pdf]

# Supplementary Figure 5

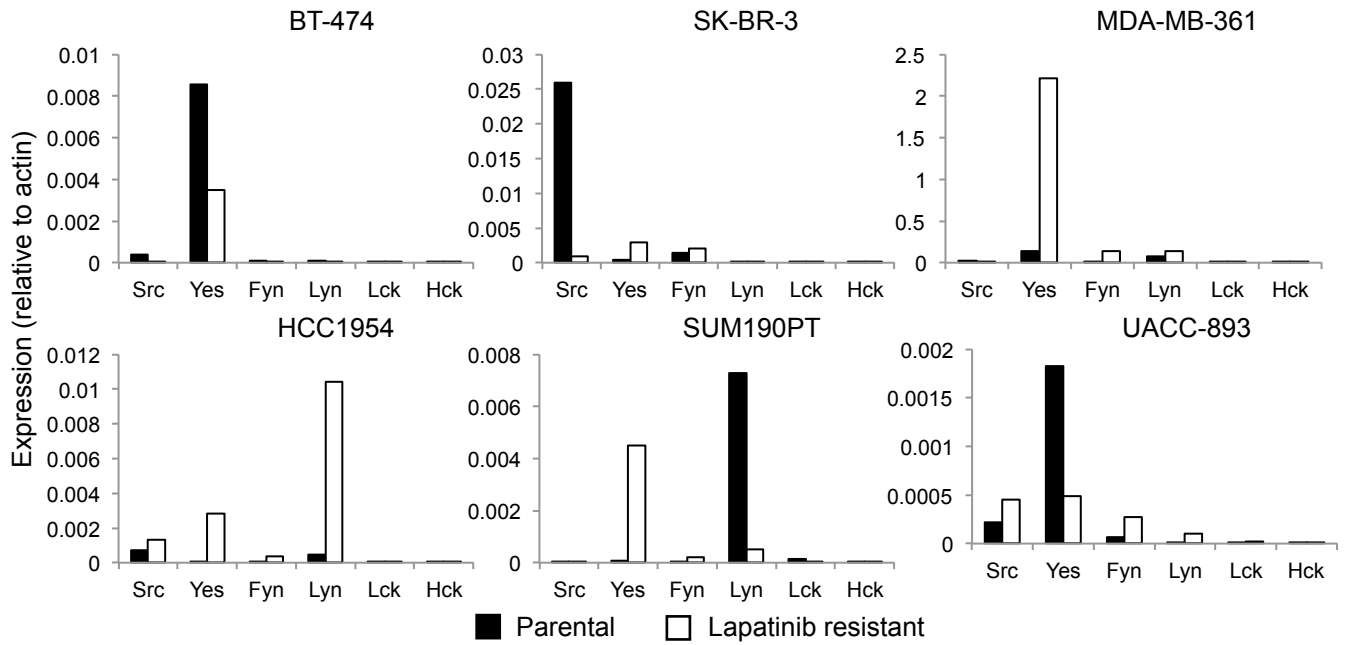

Supplement: NIHMS282065-supplement-7.pdf [file NIHMS282065-supplement-7.pdf]

# Supplementary Figure 6

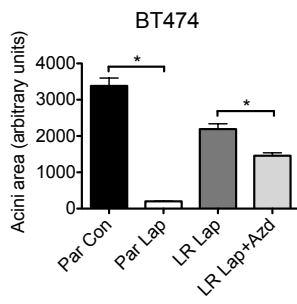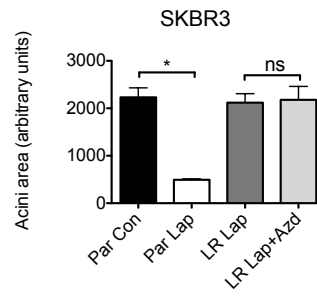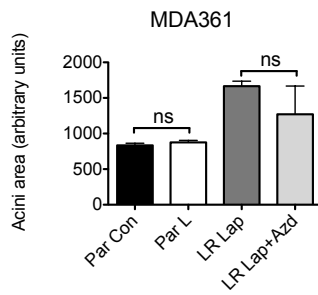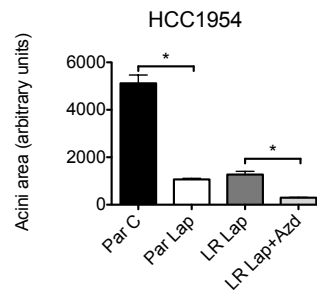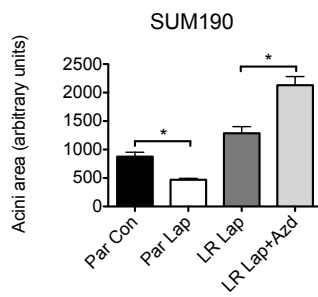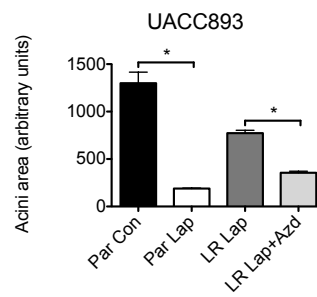

Supplement: NIHMS282065-supplement-8.pdf [file NIHMS282065-supplement-8.pdf]

# Supplementary Figure 7

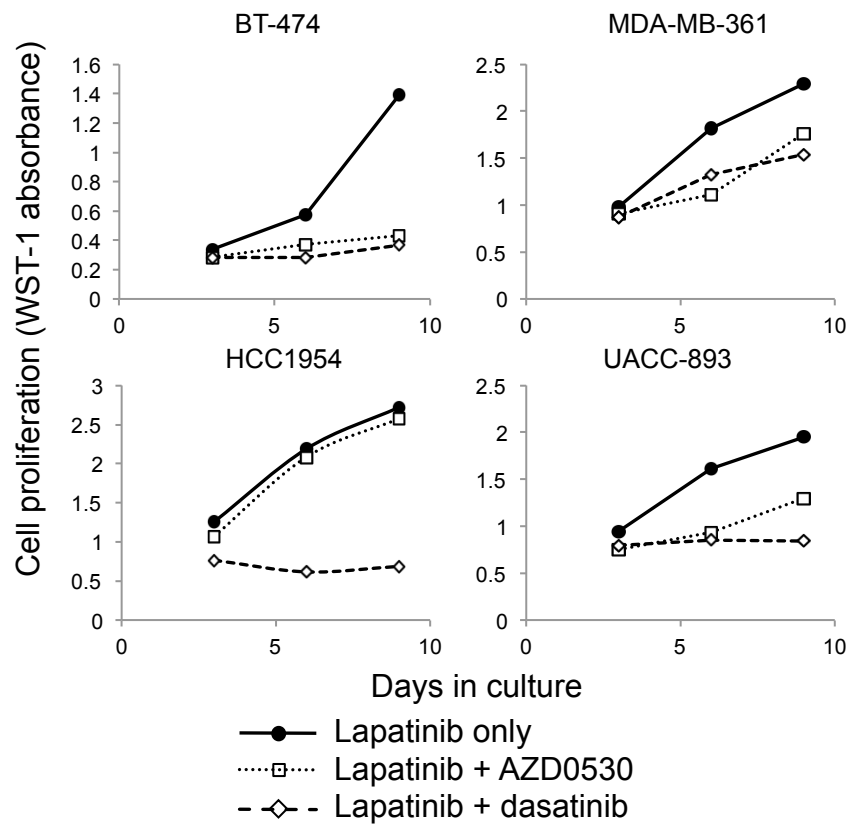

Supplement: NIHMS282065-supplement-9.pdf [file NIHMS282065-supplement-9.pdf]
